# Supplementary material for: The effect of Mindfulness-Based Stress Reduction on wound healing: a preliminary study
Source: Springer Nature journal article supplement (doi:10.1007/s10865-017-9901-8), 2017-11-20
Supplement: MOESM1 [file 15240326]

**Table S1**

*Absolute cytokine and growth factor concentrations (pg/mL) as measured with the multi-array platform of MesoScaleDiscovery.*

|               | WLC         |             |             | WLC         |             |             |
|---------------|-------------|-------------|-------------|-------------|-------------|-------------|
|               | Women       |             |             | Men         |             |             |
|               | T1          | T2          | T3          | T1          | T2          | T3          |
|               | (n = 21)    | (n = 21)    | (n = 18)    | (n = 5)     | (n = 5)     | (n = 2)     |
| IL-1 $\beta$  | 1.44 (1.38) | 1.80 (1.58) | 1510 (2638) | 0.88 (0.90) | 2.04 (2.43) | 5593 (1842) |
| IL-6          | 118 (104)   | 604 (376)   | 4843 (4195) | 193 (153)   | 725 (547)   | 8759 (326)  |
| IL-8          | 44.3 (37.1) | 77.4 (52.7) | 5341 (2170) | 99.7 (59.8) | 144 (94.1)  | 8255 (268)  |
| TNF- $\alpha$ | 4.51 (4.46) | 6.23 (5.53) | 1201 (2402) | 5.08 (3.34) | 6.77 (2.71) | 5112 (218)  |
| PlGF          | -           | -           | 20.0 (11.1) | -           | -           | 26.8 (7.33) |
| VEGF          | -           | -           | 580 (555)   | -           | -           | 3351 (1615) |
| sFlt-1        | -           | -           | 482 (717)   | -           | -           | 4869 (3776) |

**Table S1** (continued)

|               | MBSR        |             |             | MBSR        |             |             |
|---------------|-------------|-------------|-------------|-------------|-------------|-------------|
|               | Women       |             |             | Men         |             |             |
|               | T1          | T2          | T3          | T1          | T2          | T3          |
|               | (n = 19)    | (n = 19)    | (n = 18)    | (n = 3)     | (n = 3)     | (n = 2)     |
| IL-1 $\beta$  | 0.51 (0.39) | 1.29 (1.16) | 692 (994)   | 0.30 (0.34) | 0.78 (0.80) | 3784 (828)  |
| IL-6          | 118 (101)   | 565 (482)   | 4686 (5064) | 144 (140)   | 384 (114)   | 6582 (3363) |
| IL-8          | 45.8 (40.4) | 76.4 (51.4) | 3970 (2167) | 31.7 (13.5) | 64.8 (27.4) | 7405 (1848) |
| TNF- $\alpha$ | 3.03 (2.24) | 5.14 (3.55) | 894 (1360)  | 5.72 (5.23) | 7.51 (7.82) | 3815 (2042) |
| PIGF          | -           | -           | 11.6 (5.30) | -           | -           | 31.9 (15.4) |
| VEGF          | -           | -           | 412 (381)   | -           | -           | 761 (132)   |
| sFlt-1        | -           | -           | 477 (692)   | -           | -           | 815 (890)   |

**Table S1** (continued)

*Note* Data are presented as mean (SD). WLC = waiting-list control group; MBSR = Mindfulness-Based Stress Reduction group; T1 = 3 hours post wound induction; T2 = 6 hours post wound induction; T3 = 22 hours post wound induction; IL = interleukin; TNF- $\alpha$  = tumor necrosis factor  $\alpha$ ; PlGF = placental growth factor; VEGF = vascular endothelial growth factor; sFlt-1 = soluble Fms-like tyrosine kinase-1.
